# Supplementary material for: WO3-Nanocrystal-Modified Electrodes for Ultra-Sensitive and Selective Detection of Cadmium (Cd2+) Ions
Source: MDPI journal article supplement (doi:10.3390/chemosensors11010054), 2023-01-07
Supplement: s1 [file s1]

Supplementary

# WO<sub>3</sub>-Nanocrystal-Modified Electrodes for Ultra-Sensitive and Selective Detection of Cadmium (Cd<sup>2+</sup>) Ions

Ruiqin Gu <sup>1</sup>, Yunong Zhao <sup>1</sup>, Huibing Fu <sup>2</sup>, Qing Huang <sup>1</sup>, Long Li <sup>1</sup>, Zhixiang Hu <sup>1</sup>, Licheng Zhou <sup>1</sup>, Bingbing Chen <sup>3</sup> and Huan Liu <sup>1,\*</sup>

<sup>1</sup> School of Integrated Circuits, School of Optical and Electronic Information, Wuhan National Laboratory for Optoelectronics, Optics Valley Laboratory, Huazhong University of Science and Technology, Wuhan 430074, China

<sup>2</sup> Zhengzhou Winsen Electronics Technology Co. Ltd., 299 Jinsuo Road, Hi-tech Zone, Zhengzhou 450001, China

<sup>3</sup> School of Energy Science and Engineering, Nanjing Tech University, Nanjing 210000, China

\* Correspondence: huan@hust.edu.cn

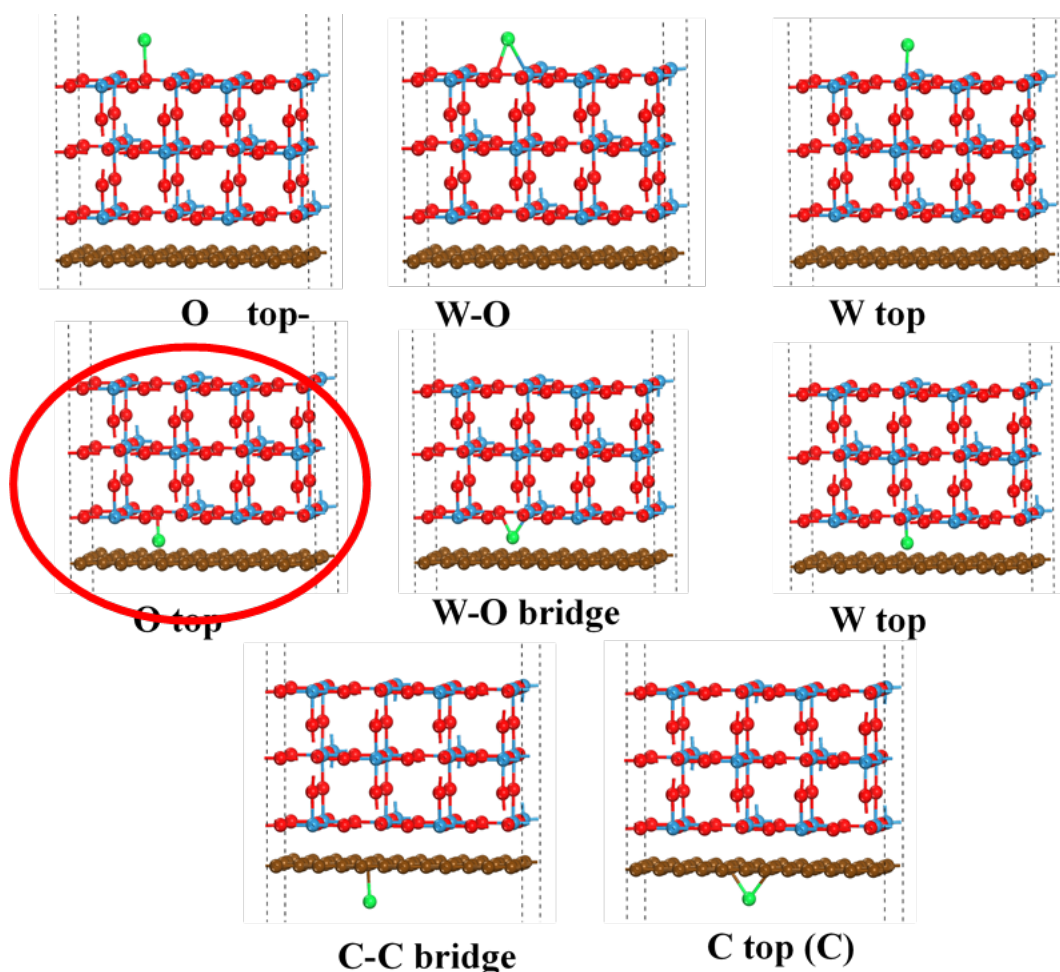

**Figure S1.** Schematic diagram of the adsorption sites of heavy metal ions on the modified electrode surface.
